# Supplementary material for: The semi-dwarfing gene Rht-dp from dwarf polish wheat (Triticum polonicum L.) is the "Green Revolution” gene Rht-B1b
Source: PubMed Central journal article supplement (PMC7814455; doi:10.1186/s12864-021-07367-x), 2021-01-19
Supplement: 12864_2021_7367_MOESM4_ESM.pdf [file 12864_2021_7367_MOESM4_ESM.pdf]

**Table S2 The information of SSR primers on 4BS chromosome**

| <b>Number</b> | <b>Primer name</b>  | <b>Forward primer</b>    | <b>Reverse primer</b>    |
|---------------|---------------------|--------------------------|--------------------------|
| 1             | <i>Xgp 8A5D</i>     | GCAGCAACAACCTCTTCGACA    | TGCCCTTCTGTGGCTAGATT     |
| 2             | <i>Xgpw0103</i>     | CATGATGAGGAGGGAGTAGTTC   | TCAAAGGGACAGACTCAGTTC    |
| 3             | <i>Xgpw0110</i>     | TCAATTCCAGCACGGTTACA     | CGAGGGCTTGAAATGAACAAC    |
| 4             | <i>Xgpw0457</i>     | CGGATATTTAAGAAACGGTGAAGG | GAGGTGTTGGTGAGGATGAC     |
| 5             | <i>Xgpw0703.1</i>   | CTTGATGGCACGAGGATGA      | CAACACTGGTAGCAGGATATAGAG |
| 6             | <i>Xgpw0722</i>     | GCCAGAGAGGACCAAAGATG     | GCGAGAGGGCAGTCATATTC     |
| 7             | <i>Xgpw08F3</i>     | GTCTTCTTCGGCAGACAAGG     | CAACCCCATCGGTAAACAAG     |
| 8             | <i>Xgpw0916</i>     | CGGTGTGCGTGTGATATAGA     | GAGATGGTTGTTGTGTTACAGATG |
| 9             | <i>Xgpw0CD3</i>     | TCTTTTGCGGGGAAAGAATA     | ACATGGGTCAGGCAGCTTAC     |
| 10            | <i>Xgpw11ED</i>     | TATGAATGGATCCACAGCGA     | CAACGCAGATACACACACCC     |
| 11            | <i>Xgpw1221</i>     | AAACGAACATCTACATCATGCA   | TTAACACGCACAACACACA      |
| 12            | <i>Xgpw122700.1</i> | AGCCTCTCTGATGTGCAAGG     | CCCAACACCATCGTCCTAAT     |
| 13            | <i>Xgpw122900.1</i> | AAGTTATCGGGTCTGCGATG     | CTTTTGTCCCGGTAGCTTTG     |
| 14            | <i>Xgpw123000.1</i> | AGGACGGTGAGGAAGAGGAC     | ATGGGGTCCCCTAAATCAA      |
| 15            | <i>Xgpw123100.1</i> | TAGCAAGCATCACCTCATGG     | AACAGGCTCTTTCCCTGGT      |

---

|    |                     |                       |                      |
|----|---------------------|-----------------------|----------------------|
| 16 | <i>Xgpw123800.1</i> | GATGAAGGCTTCCACCAAAA  | CATGGGATCTCTTTGTCGGT |
| 17 | <i>Xgpw123900.1</i> | AGTGCATCATGTCGAAGCAG  | GATTCGGCTAGTAGCAGCG  |
| 18 | <i>Xgpw124500.1</i> | GGCCTCACCTTCTTCTTCT   | GGAGACAGATGCGGATGAAT |
| 19 | <i>Xgpw124600.1</i> | TTGTAGGCGGGAAAAGAGAA  | TTGATTGATGTGTGTGCGTG |
| 20 | <i>Xgpw124800.1</i> | TTTTACCATTTGCCTCAC    | GACCAACACTTAGACAAG   |
| 21 | <i>Xgpw125500.1</i> | CTCACCACCACCTATATTTT  | GGACCAACACTTAGACAA   |
| 22 | <i>Xgpw125700.1</i> | CGAATCCAATATTGTGGAGGA | CGGTGGCTTTAGTCATGTTG |
| 23 | <i>Xgpw126000.1</i> | TGCCTCCAGCATAGTCACTG  | AGGGCAGGAAAAAGTGAAT  |
| 24 | <i>Xgpw126300.1</i> | GCTTGCCTTATATTTTGGGGA | GAGTTGGTGATGCTCCCATT |
| 25 | <i>Xgpw126500.1</i> | TATGCTGTTGGGAGATGCAG  | GCATCGGCAATACAACCTCC |
| 26 | <i>Xgpw126500.2</i> | TAATCCCTTCCCACATGCTC  | GGGAGACAGGAGGTTCAACA |
| 27 | <i>Xgpw127200.1</i> | CACAAAGGAGCAGCAAATCA  | AACATCTGTCTTGCCTGCAG |
| 28 | <i>Xgpw127400.1</i> | GACTGCAGTATCCTGTGGCA  | TCCTGAGGAAGATACGGGTG |
| 29 | <i>Xgpw128400.1</i> | GCCAACTCTTGCTTTTGAGC  | ACGTTGTGCTCTTCGCTTTT |
| 30 | <i>Xgpw128500.1</i> | TGACACCGAGGTTTGCATTA  | CAGCAGATGCTTCAACCAAA |
| 31 | <i>Xgpw128600.1</i> | GCCCCTTCCTTGAAGTTGTT  | TTCACGCTCCTAGCACATTG |
| 32 | <i>Xgpw129200.1</i> | GAGAAGGAGGCGAGGAGTTC  | CGATATTCATGCTGCAATGG |

---

---

|    |                     |                      |                       |
|----|---------------------|----------------------|-----------------------|
| 33 | <i>Xgpw130400.1</i> | GGCAATCAATCGGAAGAAGA | CCAAGGATGTGGTTCTGGTT  |
| 34 | <i>Xgpw131100.1</i> | TTCATGCTCATCGTGGTTTC | GAGGGTACACTCCACCATGC  |
| 35 | <i>Xgpw131200.1</i> | GAGCATTGCTGCTCTTTC   | GAGTACCACAAGCACCCGAT  |
| 36 | <i>Xgpw131400.1</i> | GTTAGTTGGGTCAGGCGAAG | CTAGCAGGGATGGGATTTGA  |
| 37 | <i>Xgpw131500.1</i> | TTCCGGCTTTAATTTGCTTG | AGCAACCCCTTTGCCTAAT   |
| 38 | <i>Xgpw132500.1</i> | TGGCTCATGGACGAGTATCA | CAGCAACCTGTTCTTGTGGA  |
| 39 | <i>Xgpw132700.1</i> | GGAGGAGGTAGAGGAGGAGG | TTTATCGCTCCCATCTTTGG  |
| 40 | <i>Xgpw133100.1</i> | GCCTCCTCCAACACCATCTA | TCCGTCCATAAAAACTTGCC  |
| 41 | <i>Xgpw133200.1</i> | AGGAGCGGAGGGAGTAATGT | GAGCAGAGCACATCAGTTCG  |
| 42 | <i>Xgpw133500.1</i> | GCTCACTCCTCTTCCGTGTC | AAAGAAAACGACCGATTCCA  |
| 43 | <i>Xgpw133600.1</i> | GCCATCTACGCTGACAGTGA | TTCTTGTTCCAACCAGGAGG  |
| 44 | <i>Xgpw134000.1</i> | TACATGCAACTGATCCAGCA | GGTCCTCGTCGCTGAAGTAG  |
| 45 | <i>Xgpw134200.1</i> | AGTAAGCACCAATGCCATCC | TGCCAGCAGTACAAAGTTCCG |
| 46 | <i>Xgpw135000.1</i> | GATGATTTGCGATTCCCATT | GCCTTGTGCTCTTTGGACTC  |
| 47 | <i>Xgpw135700.1</i> | CTAGGAAGATTGCACCGAGC | TCTGTAAATCTCCGATGCCC  |
| 48 | <i>Xgpw135800.1</i> | GTCTCGCTCGACAGGCTC   | GCCTGGTGGTAGAAATGGAA  |
| 49 | <i>Xgpw135900.1</i> | AGGTAGCTCCATTCCTGCAA | TGTTTGTGATGTGGCTCGAT  |

---

---

|    |                     |                             |                         |
|----|---------------------|-----------------------------|-------------------------|
| 50 | <i>Xgpw136000.1</i> | ACGGTGGGGAGCTAACCTAT        | GGACTTGTTGCGGAAACATT    |
| 51 | <i>Xgpw145500.1</i> | GCCAGATTGATTCCATCCTC        | GTCACCCCAAACCTCTCGTA    |
| 52 | <i>Xgpw145600.1</i> | GAGTACGAGGAGGGCTACGA        | CGGTTCAGCTAGACCGCTAC    |
| 53 | <i>Xgpw148100.1</i> | TCCCAGATGCCAATGAATTT        | GGAGGCCAAAAGGCTCTAGT    |
| 54 | <i>Xgpw1483.1</i>   | AATTTCAAAGTCATGTTCTCGGTTT   | CAATGCCTGTGTGTTGCTAC    |
| 55 | <i>Xgpw148600.1</i> | GCAGCAGAGGATGAAGCAG         | AGGTAAGGAGCCCACATGC     |
| 56 | <i>Xgpw1566</i>     | TGCCGAATAACCACTGTTGA        | CCGTTCAATTTGTAGTGGGGT   |
| 57 | <i>Xgpw1AFB</i>     | CCGTGCGCAGATATAGAACA        | AGCATCTGTGCTGACAGTGG    |
| 58 | <i>Xgpw1D85</i>     | TCTACCACTGCAATGCAACC        | AACTCTCTCTCCTCTCCGGC    |
| 59 | <i>Xgpw2161</i>     | TAAGATCCAACACTACAATAGCAAAGC | CCATGATGAGGAGGGAGTAG    |
| 60 | <i>Xgpw2800.1</i>   | AGAGCGCCATAGCGATACAC        | TTGGCTGATTATTTTTCCCA    |
| 61 | <i>Xgpw2830.1</i>   | AAGGATTTGGGACGGAGTTT        | GAGAGGAACCAAGAATGTAGGA  |
| 62 | <i>Xgpw2871.1</i>   | CTTGTCGCCGTCCAACCT          | GGATCGTCGGCTGCTAGT      |
| 63 | <i>Xgpw2970</i>     | GCAGGAGGAGTGGAGAAG          | AGAGAGAAAGAAAGAGGCAAAGA |
| 64 | <i>Xgpw2977.1</i>   | GGGCTGAGGGTATGTACTAG        | ACATCAAGATCGTGCCATAGA   |
| 65 | <i>Xgpw2994.1</i>   | CAGTGTCTGACCATTATTAGCA      | CTGTCTAGTCTGTGTACTCTCC  |
| 66 | <i>Xgpw29F6</i>     | ATCAGCATGTGCAAAACCAA        | CATTTTCAAGGCGGCATATT    |

---

---

|    |                   |                           |                            |
|----|-------------------|---------------------------|----------------------------|
| 67 | <i>Xgpw2F9F</i>   | CTGGGGACGCTTTTGTTTTA      | GATCAGTTCCGCTTCTCCAC       |
| 68 | <i>Xgpw3006.1</i> | ATCAATGGGCATCAGGTAGG      | CCTTTGCGACGACTTTCTG        |
| 69 | <i>Xgpw3008.1</i> | TTCCGCTTTGGACTGTCTAAA     | TCGTGCATTGGTCGTCTC         |
| 70 | <i>Xgpw3035.1</i> | CCTCTAACCACAAGCACTCT      | GGTCTAGGACTAGGAGGAGATAA    |
| 71 | <i>Xgpw3080.1</i> | GCATATTAGAGCCAAGTGTAA     | GAAGGAGAAGGAGAAGAACAATG    |
| 72 | <i>Xgpw3090.1</i> | ACCTACCTACAATGTTTGACTATCG | CCTTATTCTCTGCTACACATATCCA  |
| 73 | <i>Xgpw3111.1</i> | TGTGTTGGAGCGATTCAGAT      | TTTCGCCTCCCAACCTTT         |
| 74 | <i>Xgpw3118.1</i> | CCATAGAGAGAACACGAGAGAG    | TATCCATGACGAGGAGGAAGTA     |
| 75 | <i>Xgpw3120.1</i> | GCGGAAGGATCTCATCAAC       | CGTCACTCATCGGAGGAG         |
| 76 | <i>Xgpw3121.1</i> | CGGAGGTGTTGGTGAAGAT       | GCAGAATCAGGGAACGTAGAA      |
| 77 | <i>Xgpw3128.1</i> | GCATACTACCAGACCAGTGTT     | ATCTATCTGACGGGCTTG TG      |
| 78 | <i>Xgpw3129.1</i> | GGAGAAGGAGTGGATCTATCA     | CTCACTTTGAACAAACCCTAGA     |
| 79 | <i>Xgpw3131.1</i> | CGTTGGAGAAGTGGTTGGT       | GTATGTGAAGATGAGCAAAGTGAAG  |
| 80 | <i>Xgpw3132.1</i> | CTGACTGACTGACTGACTGAC     | GATCCCTTTTCGCCATCTCAG      |
| 81 | <i>Xgpw3134.1</i> | CACTGGTGTCCATCTTCATCAT    | GGGAGAAACATCATAAGATCCA ACT |
| 82 | <i>Xgpw3140.1</i> | CGAGAGTTTTGTGTGAGAGA      | ACCACTAAAATTAGTCTCTCTC     |
| 83 | <i>Xgpw3149.1</i> | GGCAAAGATAACCGGATTACAAG   | CTGCTAATTCGCCAAGTCCA       |

---

---

|     |                   |                          |                           |
|-----|-------------------|--------------------------|---------------------------|
| 84  | <i>Xgpw3151.1</i> | CCGCTAACCGAAAGAAAGAA     | GTAGGTATACCCCGTTGTGA      |
| 85  | <i>Xgpw3152.1</i> | TGGCATAGTATGGTACCGTAC    | TTGGGACTAAAGGCTTTGTTG     |
| 86  | <i>Xgpw3154.1</i> | CCACGATGAGGAGGGAGTAG     | GCCCATGATATAGATCACGAGAG   |
| 87  | <i>Xgpw3156.1</i> | GGTGTTTGAAATCATCATTCTTA  | AAGGCAGCTTGAAGAATTAG      |
| 88  | <i>Xgpw3157.1</i> | ACGAGTATGATGGCGACGAG     | GCTCATTTACTCCACTCAACCTC   |
| 89  | <i>Xgpw3160.1</i> | TCCGTTGTTGCTCTTCATTG     | CGGGTTGAGTTTAGCATAGAG     |
| 90  | <i>Xgpw3163.1</i> | GTTGGTAGGTTGCGCTCA       | GGGAATGCGTAGGGAAAGA       |
| 91  | <i>Xgpw3173.1</i> | TGGGCTAGATGGAGAAATGTTA   | CCTAGAACCAACTCAACTGTC     |
| 92  | <i>Xgpw3298.1</i> | AACCTTGTTGCCCTTCTGAT     | CGAATAGAACTCCAAGAACATCAAG |
| 93  | <i>Xgpw3325.1</i> | GCCATCACCTCGTCTTCTAT     | CGGTCGGCTTCTCCTATC        |
| 94  | <i>Xgpw3390</i>   | AACATTGCACCTTCTCACCTT    | CTTCACGCTTGCTTGCTAGT      |
| 95  | <i>Xgpw3427.1</i> | AGTCAGTCAACAACACCAAGA    | CCACATTCATTCCGTTTCATAGAC  |
| 96  | <i>Xgpw3447.1</i> | CCCTGTTCACCTGCTCTC       | ACTTCATCCGTAGTAACCATTTGT  |
| 97  | <i>Xgpw3472.1</i> | GCAAGTTCAGGACGAGGAA      | TCTCCAATGGCAAGTAGATGTC    |
| 98  | <i>Xgpw34A2</i>   | GGGGCCTGCCTAATTTATTC     | AGAAGGGGAACAGAGGTCGT      |
| 99  | <i>Xgpw3536.1</i> | TCATCGGAGAGTATTAGAACAGTG | TCAGTAGCAAGTGCAGTACATAA   |
| 100 | <i>Xgpw3552</i>   | GACTCCTCCTCTGAATCCATT    | AACCTGGTCACTACATCTCTG     |

---

---

|     |                   |                           |                        |
|-----|-------------------|---------------------------|------------------------|
| 101 | <i>Xgpw3852</i>   | ATTCCTCCCACATTAGTTCATCT   | CAGGGTGGAAGAACTTACAGA  |
| 102 | <i>Xgpw3862.1</i> | TTGGCTGGCCTCGCTAAA        | GGCGATGCCTCAAGATGG     |
| 103 | <i>Xgpw3868</i>   | TTGTACAGTAGTAGTATCGATGGAT | TTTATTTGAGGAGTGGGTTGTG |
| 104 | <i>Xgpw3957.1</i> | ATCCGCCGCAGAAACATC        | GCTCGCTCCTACACTAACC    |
| 105 | <i>Xgpw3BCD</i>   | GATCTGGACCTCTGCCTGAC      | TAAACCAAGTTGCACGTCCC   |
| 106 | <i>Xgpw3C28</i>   | TCCTCCTTTCCCTCCCTAAA      | CAGTGGCGAATCTAGCATGA   |
| 107 | <i>Xgpw3DC4</i>   | CCTCTTTGTTCGGAGAAGTGC     | TTTCCAAAACCCGATAGCAG   |
| 108 | <i>Xgpw4047.1</i> | CGATTCAGTGCCAAGTCA        | GTCGTCGATGTCCCTCTC     |
| 109 | <i>Xgpw4049</i>   | ATGGTAATGGGATTGCTGAGT     | CTGCCGACCTAGAACCTATC   |
| 110 | <i>Xgpw4064.1</i> | AACCAGCAAACCAAGACAAC      | CACCATGCCGACTCTCTC     |
| 111 | <i>Xgpw40AA</i>   | GGCACACTGACAGACAGCAT      | ATATTTCTCCTCTGCGGCAA   |
| 112 | <i>Xgpw40AA</i>   | GATCTGGATGAGGATTCGGA      | GATCTGGATGAGGATTCGGA   |
| 113 | <i>Xgpw4100.1</i> | ATGGTTACAACACTACAGATG     | ATATGGCAAAGAGAAAGC     |
| 114 | <i>Xgpw4117</i>   | GCACTGTCCTCTCCAAAAGC      | AGTTTGCACGATAAACGCT    |
| 115 | <i>Xgpw4140</i>   | CGAAAATAAGACTCAAATGGGC    | AGTGGTTTCTATCCAGCACACA |
| 116 | <i>Xgpw4233.1</i> | CGTAGCTGTTTATGTCCACCTT    | ATGATTGGTCTGGCTGATGAG  |
| 117 | <i>Xgpw43B8</i>   | TCGTCGTCTGTCCAGTGAAG      | CGGTCGCACCACACTACTC    |

---

---

|     |                   |                           |                            |
|-----|-------------------|---------------------------|----------------------------|
| 118 | <i>Xgpw4507</i>   | CCTCTGATGTGGGTGGAAGT      | GTCGGCCTATAAGACCCCAT       |
| 119 | <i>Xgpw4564</i>   | CCAGGTAAGTGTCCCAGGTG      | GTTGAGGTCTGTTGGAAATAATTCT  |
| 120 | <i>Xgpw4800.1</i> | GAGGTTCGCATTTACAG         | GGTTCTGACCATCACTTG         |
| 121 | <i>Xgpw4900.1</i> | CTTCCAGGAATATGTTAGGT      | CTCGAATTCCACCATGTG         |
| 122 | <i>Xgpw4C7D</i>   | CACCGTCACATCACATCACA      | CACTTCAGGATGTTCCCCAT       |
| 123 | <i>Xgpw5000.1</i> | CTTCACAGTCTGTCTCTC        | ACCCAGTTACAACAATCA         |
| 124 | <i>Xgpw5032.1</i> | GAACAAGTATCATCATCACACAACA | CTGCTGCTGCTCTTCTCT         |
| 125 | <i>Xgpw5200.1</i> | AACAGTACAAGGGAAGAAC       | GATCCGCATCTGAGAGAG         |
| 126 | <i>Xgpw5300.1</i> | CAGGTAACTCGCTATATTGAT     | TGGCAAAGTAGATCCTTC         |
| 127 | <i>Xgpw5400.1</i> | GCCTCTGTGCCACTGAAC        | CCACCTGTCATGCTCTGTTAG      |
| 128 | <i>Xgpw5500.1</i> | TCATAGGTTCTTGGGTAG        | ATGACTGGTAAGCTAGTT         |
| 129 | <i>Xgpw5500.2</i> | GGATTTAGGAAGGACTGT        | CTTGGTCATCTCCTCTAC         |
| 130 | <i>Xgpw5600.1</i> | GAGGAAGGAGAAGGAGAAG       | AGGAAACTAAGCATATTTGAGATAA  |
| 131 | <i>Xgpw5700.1</i> | GCTATAAGTGAATGTTGTAGAGG   | CTTCGCATTTGGTTTGTCT        |
| 132 | <i>Xgpw5800.1</i> | AGATCCAACTATAATAGCA       | CTATGTGTTTAACTCTCTC        |
| 133 | <i>Xgpw5900.1</i> | TACTTAACTTGTCAGTCTTA      | TCATCCTCGTCTTCATCT         |
| 134 | <i>Xgpw6000.1</i> | AAATCAACGAGAACTTAACTTA    | TGGTTTAGTTTAGTTTAAATTTAGGT |

---



---

|     |                 |                         |                           |
|-----|-----------------|-------------------------|---------------------------|
| 135 | <i>Xgpw6003</i> | CTCTGCGTTAGGACTCTATACAA | TCCCCTCTAATAGAAAACATGATGA |
| 136 | <i>Xgpw6102</i> | GGAGAAGTAACCAAGTGGATGAG | GCCCATGTACCCTTTCATTCT     |
| 137 | <i>Xgpw6124</i> | TCAGACCCACCGCATAAATC    | GGGTAGGGAGATGGTTTGTG      |
| 138 | <i>Xgpw6241</i> | GGCAACAGCATAGAGGGTAC    | AAGAGGAATAGGGAGAGGAGTTT   |
| 139 | <i>Xgpw6332</i> | CAGGCGAGGACTGACTTTAG    | TGACGAATAGTACAAGGAAGAACAA |
| 140 | <i>Xgpw673D</i> | TGCCTCGTTCCTTATTTTG     | TCACCATTGTTTCCACAGGA      |
| 141 | <i>Xgpw674C</i> | ACACCATCCTATGCTCTCGG    | CACGATAGTCAACATCCCCC      |
| 142 | <i>Xgpw6884</i> | TTCCTTTGCTACTTCTGCTAACT | CTCCACCGTCTACTGTTCATC     |
| 143 | <i>Xgpw6895</i> | CATTGGTCCGTCTTATGGTAGAT | GTCAAGAACCACCTGGAAGT      |
| 144 | <i>Xgpw6973</i> | CAAATGGACTGGCACATACAAAT | GGTGAACAATATGGAGGTGAGAA   |
| 145 | <i>Xgpw7189</i> | GGCATGGATGAGGTCATAGG    | GCTAGTTTTGCTTGCCTTGG      |
| 146 | <i>Xgpw719B</i> | TGGTATTGTTGCTGTCTGCTTT  | GCAATGGCTACAATGTCCAG      |
| 147 | <i>Xgpw7322</i> | AGACACCAACCAAGGAGACG    | TCATAAGGTTGGGGAGCAAG      |
| 148 | <i>Xgpw735F</i> | CTGACCTCTCGTCACACAGC    | ATCGTTCTGGGTTGTTGGAG      |
| 149 | <i>Xgpw7363</i> | GCTCGGTTGGTACAAGATTG    | CACACTCAGTTCGTCTCTCT      |
| 150 | <i>Xgpw7581</i> | TGACCACGTTTTTGTGAGC     | TGCTCTTTGGGGTGTGTTAGG     |
| 151 | <i>Xgpw7762</i> | CGAGCACACAACCTCCAATTC   | GAGTAGGAGGTCTTGCCTTC      |

---

---

|     |                   |                          |                           |
|-----|-------------------|--------------------------|---------------------------|
| 152 | <i>Xgpw7847</i>   | ATGCTTTGATTTCTTCCCTGAG   | GACGGTATAGACGACGATGG      |
| 153 | <i>Xgpw8200.1</i> | CTGTTCTTTCATTGGTCGCA     | CGCACAGATAAATGCAATGG      |
| 154 | <i>Xgpw83E7</i>   | ATTCTACACCCCAGGAACGA     | TGTCTCTTTCCTTGTACCCCA     |
| 155 | <i>Xgpw8412</i>   | TCTATTGCCTTACTCATGGATT   | CGTAGTGCATCATGTCTGAAG     |
| 156 | <i>Xgpw8716</i>   | CCTACCATTGTAACCGACTCTAT  | CGTCCTGCTTGATTGATATTGAT   |
| 157 | <i>Xgpw8748</i>   | CCCAATCCGATGAAACTAATGAAG | CGAGCCTAAACCATAATTCCCTTA  |
| 158 | <i>Xgpw8773</i>   | TCCTCAAGCAAAAGCCGATA     | GATGTTGTGATGAATCGTTCCTT   |
| 159 | <i>Xgpw8A5D</i>   | ACAGAATCTGCAGGTCCCAC     | CACCACACCACCAATCTCTG      |
| 160 | <i>Xgpw8AA9</i>   | AAGTGGATCTGGCCTCCTTT     | GTGGTACACGGTTTCGGTTT      |
| 161 | <i>Xgpw8B93</i>   | CCGAAGTTCGTCATCAATCA     | AGCAGCTCAAAAAGGACGAG      |
| 162 | <i>Xgpw8BA4</i>   | GTCGATTGCTGGGTGAGTTC     | CAGAGCAGAATGCAGAGACG      |
| 163 | <i>Xgpw8F56</i>   | TAAATGCTGCCACAAAGTGC     | TTTGACATGGCTTCATTCCA      |
| 164 | <i>Xgpw9337</i>   | CTCACATGCACCCTTTGCTA     | GCATTTTGGAGCATCGATTT      |
| 165 | <i>Xgpw9371</i>   | TACTCACGGTTGCTTTGCTA     | CCTGGGACCTCCTAACTACT      |
| 166 | <i>Xgpw9422</i>   | TAAAAACCAGACCAAACCCG     | GTGGAAGGCGACCTCAGAT       |
| 167 | <i>Xgpw9508</i>   | TCGTTGTTGTTTCAGAGGAGAG   | GGAAAGATTAGCAGCCCAGT      |
| 168 | <i>Xgpw9586</i>   | CTATGGCGGAGCAACCTTAT     | CCGGTTAATACAATTCTAGCATGAA |

---

---

|     |                 |                        |                          |
|-----|-----------------|------------------------|--------------------------|
| 169 | <i>Xgpw9952</i> | GCTACAACAACAACGCTTACAA | GTCATAGGTCCAAGTGGTGTC    |
| 170 | <i>Xgpw9D35</i> | TCAAAATGATGTGATGCGGT   | TGTCAACAAAAAGATACGCTAAGA |
| 171 | <i>Xgpw9F54</i> | GGTCTTAGGTGCCAAGCAAA   | TTTGGAAGTGCCTAAGCTG      |
| 172 | <i>XgpwA396</i> | AGGGTCCTGGCAGATATCAA   | CAATTCGTGATCATTGGTGC     |
| 173 | <i>XgpwA567</i> | TGCTGGAAGCTTAGCAGCAGA  | ATGTCCTTTTCTCGTGGTGG     |
| 174 | <i>XgpwA82D</i> | CATGGGATCTCTTTGTCGGT   | GATGAAGGCTTCCACCAAAA     |
| 175 | <i>XgpwAB31</i> | CCGGTCTATCGTCATCAGGT   | CAGAAGAGGGTGAGGAGCAG     |
| 176 | <i>XgpwAC29</i> | TGCGTACAGAGATCAAGCTGTT | CTCCTGAACCCAGCAAGAAG     |
| 177 | <i>XgpwB07F</i> | GAGGCAAAATGTAGCCTTCG   | TCTCCTTCTTCTCGAGCTG      |
| 178 | <i>XgpwB4A3</i> | TCCAGTGGGCAGAGCTACTT   | GTATTCTGGACCCTGGGTGA     |
| 179 | <i>XgpwB902</i> | GGTTTTCAAGCCTGATGGAG   | ATGTTTATCCCAGGAAGTGG     |
| 180 | <i>XgpwBA65</i> | CGCTACTCCATTTCTCCAGC   | TATTCGCGTGCAATTTGGTA     |
| 181 | <i>XgpwBB50</i> | CCTGTTTGACATTTTGCTGC   | GAGATGTCCAACCTCGTGGGT    |
| 182 | <i>XgpwBCA7</i> | TTGAGCTGCCAAATTGTTGA   | ACTGCTGATGACGCTGGAAT     |
| 183 | <i>XgpwC20E</i> | ATCGAATGGGAATTTTGACG   | CGCTCGAAGGGAGATAACAG     |
| 184 | <i>XgpwCB41</i> | GCCTGAATTCCAGTGGCTAA   | ATTCGGTTCATCTTGCGTC      |
| 185 | <i>XgpwCDA2</i> | AAACAGCAGTTGACCCTTGG   | GGATTGTGAGAACCCACCAC     |

---

---

|     |                 |                        |                        |
|-----|-----------------|------------------------|------------------------|
| 186 | <i>XgpwCEC2</i> | ACCAACGACGAAAACCTCTGG  | GTCGATCATGCCTCTTGGAT   |
| 187 | <i>XgpwD080</i> | TAACTCGCAAGTGGCACAAC   | CGCCAGGGCAGTTAAGATAG   |
| 188 | <i>XgpwD9C9</i> | TTCCTATCAAACCTGGGGCAG  | TCGCTGACAAATTCTTGTGG   |
| 189 | <i>XgpwE1EA</i> | GAAAGCAGTTCCATTCGAGC   | TCAGTGCTCCACCAATAAACCC |
| 190 | <i>XgpwE58A</i> | CTCTTCCTGCGAAAACCTACGG | TTACAATTTGAGCTGTGGCCT  |
| 191 | <i>XgpwE6E4</i> | ATGTAGGGAAAGGCTGCGTA   | TCCACCCATTAGCTTTGTCC   |
| 192 | <i>XgpwE81D</i> | TCTACCACTGCAATGCAACC   | AACTCTCTCTCCTCTCCGGC   |
| 193 | <i>XgpwF574</i> | CCCTACTCAGCACCTAACCG   | GGTGAACGGACAGAAGCACT   |
| 194 | <i>XgpwF66A</i> | CTTCAACCAGCTGCAATCAA   | GAGTGGGAGTTGGATGGAGA   |
| 195 | <i>XgpwF7D1</i> | AAGAAATCAGGGGTCCCATC   | CGTATGGGTAGAATGTCTGGG  |
| 196 | <i>XgpwFCFB</i> | ACGAAGAGCAGAAGCTGGAC   | TGCCATTCTTTCTCTCGTT    |
| 197 | <i>XgpwFD88</i> | TTAATTACGCGACCAAACGG   | CACGGAAGTGCCACTCACT    |
| 198 | <i>XgpwFF39</i> | CGGATTCATCAAGGTCATCC   | CCGTCGATGCAGTCCTCTAT   |
| 199 | <i>XgpwFFA9</i> | TGGTGCAGTAGATGGAGCAG   | CAAATCCAATCGAAACCATTC  |

---
