# Supplementary material for: The semi-dwarfing gene Rht-dp from dwarf polish wheat (Triticum polonicum L.) is the "Green Revolution” gene Rht-B1b
Source: PubMed Central journal article supplement (PMC7814455; doi:10.1186/s12864-021-07367-x), 2021-01-19
Supplement: 12864_2021_7367_MOESM6_ESM.pdf [file 12864_2021_7367_MOESM6_ESM.pdf]

**Table S4 Gene-specific primers for *Rht-dp* candidate genes in DPW and TPW**

| <b>Number</b> | <b>Primer Name</b>             | <b>Forward Primer</b>     | <b>Reverse Primer</b>     |
|---------------|--------------------------------|---------------------------|---------------------------|
| 1             | <i>DELLA protein</i>           | CGATGCCGTCTACA ACTACT     | CAACTCCTAGATCGGGAAACTT    |
| 2             | <i>DELLA protein-QDZ1</i>      | AGTCACTCAAGCGGATATGC      | CACCATCATCTTGTCTCGG       |
| 3             | <i>DELLA protein-QDZ1</i>      | CGGTTCTCTTCTTGACTCG       | GCATATCCGCTTGAGTGACT      |
| 4             | <i>TB1-1</i>                   | GGTGTTTGAAATCATCATTCTTA   | AAGGCAGCTTGAAGAATTAG      |
| 5             | <i>TB1-2</i>                   | GGAGAGTATCACATCCAATATTCTA | CTCGATCAATGCTTGTAGTATATG  |
| 6             | <i>TB1-QDZ</i>                 | GCCTAAACCCATCCATAATC      | GGGAATCATAGAAAGGAAACAT    |
| 7             | <i>Zinc Finger Protein-1</i>   | TTCGCCTTCAACTAACATTAGAGA  | GGGGCAGACCGTAACAAA        |
| 8             | <i>Zinc Finger Protein-2</i>   | TCGGCGGTGTCAACTTTG        | GCCAATGTGCTATGTAAGCAATG   |
| 9             | <i>Zinc Finger Protein-3</i>   | GCTGTCTACAATACACTTGA      | CCACTAATATAGAACAACATGAAGG |
| 10            | <i>Zinc Finger Protein-4</i>   | CTCAGAATCAGTGTCGTTGC      | ACTCCCTCCTCCCTATCC        |
| 11            | <i>Zinc Finger Protein</i>     | TCTGCTTCACGCTCCTCC        | CCACCAACACCACCAGAATTG     |
| 12            | <i>Zinc Finger Protein-QDZ</i> | CGAGGAGGAGCGTGAAGCAGAA    | CCTGTCTGGCGGTGACTGTTT     |
| 13            | <i>42800-NA</i>                | GCAGGCCCTTAACAATGCTA      | GTGACTAGTACTGGTACAACAGATG |
| 14            | <i>42800-QDZ</i>               | GCTACTGTCAACCCGTA ACT     | CCTTGTCTGGTTCGCTAGT       |
| 15            | <i>EamA-like</i>               | CGTCATCTACGGTAATACCTACTA  | GCCCAATCTAAACCATTCTC      |
| 16            | <i>EamA-like-1</i>             | TTCCCCAAACACTTTCAGAC      | ACAGCAGCATAATGGATATCG     |
| 17            | <i>EamA-like-2</i>             | GTAGCTATCAACAGTGATACTCTG  | CAGGCATTGGATTATCTCTAGTC   |
| 18            | <i>EamA-like-QDZ</i>           | TGCTCTTTAAGTTTCGGTTCGTAAT | GGTGTGAATGTGGCGATGAG      |

\*Gene sequences were downloaded from wheat genome Refseq v1.0 (IWGSC 2018)
